# Supplementary material
Source: PubMed Central journal article supplement (PMC10583703)
Supplement: ehp12634.s001.acco.pdf [file ehp12634.s001.acco.pdf]

**Note to readers with disabilities:** *EHP* strives to ensure that all journal content is accessible to all readers. However, some figures and Supplemental Material published in *EHP* articles may not conform to [508 standards](#) due to the complexity of the information being presented. If you need assistance accessing journal content, please contact [ehp508@niehs.nih.gov](mailto:ehp508@niehs.nih.gov). Our staff will work with you to assess and meet your accessibility needs within 3 working days.

### **Supplemental Material**

#### **Association between Residential Proximity to Viticultural Areas and Childhood Acute Leukemia Risk in Mainland France: GEOCAP Case-Control Study, 2006–2013**

Matthieu Mancini, Denis Hémon, Perrine de Crouy-Chanel, Laurence Guldner, Laure Faure, Jacqueline Clavel, and Stéphanie Goujon

#### **Table of Contents**

**Table S1.** Distribution of the controls with respect to the geocoding uncertainty and the size of urban unit.

**Table S2.** Distribution of controls according to viticulture density (based on CLC and RPG and on RPG alone), FDep deprivation index, average daily UV radiation level, and length of major roads within 150 m, data for Figure S2.

**Table S3.** Association between childhood lymphoblastic acute leukemia and indicators of proximity to vines, by age group (GEOCAP inclusions 2006–2013, GIS-based assessment of exposure based on RPG and CLC sources).

**Table S4.** Association between the density of viticulture and the risk of acute lymphoblastic leukemia in the *Occitanie* region - Parameter estimates and 95% confidence interval (CI) in 11 density categories of viticulture density (based on polygons associated with CLC and RPG and with RPG alone), data for Figure S4.

**Figure S1.** Joint distribution of size of urban unit and viticulture density (exposure assessment based on polygons associated with CLC and RPG **(a)** and with RPG alone **(b)**) in controls.

**Figure S2.** Joint distribution of viticulture density (exposure assessment based on polygons associated with CLC and RPG **(a)** and with RPG alone **(b)**) and three potential confounding factors (FDep deprivation index of the municipality, average daily UV radiation level in the municipality, length of major roads within 150 m of the address) in controls.

**Figure S3.** Viticultural density in the municipalities of the French regions, calculated as the proportion of the municipality areas dedicated to viticulture.

**Figure S4.** Non-linear logistic regression model of the association between viticulture density and risk of childhood lymphoblastic leukemia in the *Occitanie* region (exposure assessment based on polygons associated with CLC and RPG **(a)** and with RPG alone **(b)**).

Table S1 – Distribution of the controls with respect to the geocoding uncertainty and the size of urban unit

|                                                        | Size of urban unit (inhabitants) |                         |                          |                      | Total<br>N=40,196 |
|--------------------------------------------------------|----------------------------------|-------------------------|--------------------------|----------------------|-------------------|
|                                                        | <5,000<br>N=11,948               | 5,000-19,999<br>N=4,534 | 20,000-99,999<br>N=5,127 | ≥100,000<br>N=18,587 |                   |
| <b>Uncertainty &lt; 100 m</b>                          | <b>65.9%</b>                     | <b>79.8%</b>            | <b>87.1%</b>             | <b>93.0%</b>         | <b>82.6%</b>      |
| (1) entrance of the residential plot                   | 48.8%                            | 59.0%                   | 65.1%                    | 70.7%                | 62.1%             |
| (2) projection toward the road                         | 11.3%                            | 9.0%                    | 8.8%                     | 7.0%                 | 8.7%              |
| (3) interpolation between neighboring addresses.       | 5.8%                             | 11.8%                   | 13.2%                    | 15.3%                | 11.8%             |
| <b>Uncertainty ≥ 100 m</b>                             | <b>34.1%</b>                     | <b>20.2%</b>            | <b>12.9%</b>             | <b>7.0%</b>          | <b>17.4%</b>      |
| (4) in the middle of the street                        | 5.5%                             | 5.8%                    | 5.3%                     | 3.2%                 | 4.5%              |
| (5) in the middle of an urban residential neighborhood | 0.2%                             | 1.2%                    | 1.3%                     | 1.1%                 | 0.9%              |
| (6) in the middle of a rural hamlet                    | 26.1%                            | 11.8%                   | 5.1%                     | 1.9%                 | 10.6%             |
| (7) at the town hall of the municipality               | 2.3%                             | 1.4%                    | 1.2%                     | 0.8%                 | 1.4%              |
| <b>All controls</b>                                    | <b>100%</b>                      | <b>100%</b>             | <b>100%</b>              | <b>100%</b>          | <b>100%</b>       |

N: number of controls

Table S2 - Distribution of controls according to viticulture density (based on CLC and RPG and on RPG alone), FDep deprivation index, average daily UV radiation level, and length of major roads within 150 m, data for Figure S2.

|                                                       | Viticulture density |               |                   |                   |                   |                   |           |               |                   |                   |                   |                   |
|-------------------------------------------------------|---------------------|---------------|-------------------|-------------------|-------------------|-------------------|-----------|---------------|-------------------|-------------------|-------------------|-------------------|
|                                                       | RPG and CLC         |               |                   |                   |                   |                   | RPG alone |               |                   |                   |                   |                   |
|                                                       | 0                   | ]0;<br>0.005[ | [0.005;0<br>.034[ | [0.034;0<br>.119[ | [0.119;0<br>.308[ | [0.308;0<br>.928] | 0         | ]0;<br>0.003[ | [0.003;0<br>.012[ | [0.012;0<br>.036[ | [0.036;0<br>.086[ | [0.086;0<br>.678] |
| FDep deprivation index                                |                     |               |                   |                   |                   |                   |           |               |                   |                   |                   |                   |
| [-6.7;-1.2[                                           | 7,557               | 114           | 111               | 123               | 87                | 48                | 7,626     | 102           | 94                | 84                | 80                | 54                |
| [-1.2;-0.2[                                           | 7,115               | 189           | 157               | 177               | 186               | 215               | 7,228     | 159           | 143               | 144               | 168               | 197               |
| [-0.2;0.5[                                            | 7,110               | 202           | 166               | 176               | 176               | 209               | 7,201     | 176           | 160               | 181               | 158               | 163               |
| [0.5;1.3[                                             | 6,996               | 181           | 222               | 202               | 221               | 217               | 7,103     | 168           | 188               | 190               | 199               | 191               |
| [1.3;5.4]                                             | 7,395               | 119           | 148               | 127               | 134               | 116               | 7,472     | 108           | 128               | 114               | 108               | 109               |
| Average daily UV radiation level (J/cm <sup>2</sup> ) |                     |               |                   |                   |                   |                   |           |               |                   |                   |                   |                   |
| [85.5;94.6[                                           | 7,853               | 59            | 37                | 37                | 37                | 17                | 7,887     | 61            | 30                | 30                | 18                | 14                |
| [94.6;99.3[                                           | 7,636               | 67            | 81                | 81                | 96                | 78                | 7,664     | 79            | 85                | 95                | 64                | 52                |
| [99.3;101.2[                                          | 7,860               | 50            | 45                | 37                | 23                | 24                | 7,870     | 47            | 35                | 25                | 34                | 28                |
| [101.2;109.6[                                         | 6,927               | 277           | 188               | 218               | 202               | 227               | 7,058     | 245           | 157               | 173               | 175               | 231               |
| [109.6;136.5]                                         | 5,897               | 352           | 453               | 432               | 446               | 459               | 6,151     | 281           | 406               | 390               | 422               | 389               |
| Length of major roads within 150m (m)                 |                     |               |                   |                   |                   |                   |           |               |                   |                   |                   |                   |
| 0                                                     | 25,410              | 629           | 617               | 617               | 620               | 642               | 25,754    | 553           | 551               | 538               | 562               | 577               |
| ]0;203.6[                                             | 2,137               | 39            | 33                | 49                | 44                | 30                | 2,167     | 35            | 39                | 35                | 28                | 28                |
| [203.6;275.2[                                         | 2,142               | 44            | 43                | 32                | 34                | 36                | 2,167     | 33            | 36                | 30                | 35                | 30                |
| [275.2;299.3[                                         | 2,144               | 30            | 38                | 40                | 40                | 40                | 2,163     | 28            | 28                | 44                | 37                | 32                |
| [299.3;437.6[                                         | 2,118               | 39            | 44                | 37                | 50                | 45                | 2,140     | 42            | 35                | 39                | 39                | 38                |
| [437.6;1967.2]                                        | 2,222               | 24            | 29                | 30                | 16                | 12                | 2,239     | 22            | 24                | 27                | 12                | 9                 |

RPG: Graphic Parcel Register, CLC: Corine Land Cover, Fdep: French municipality deprivation index

Table S3 - Association between childhood lymphoblastic acute leukemia and indicators of proximity to vines, by age group (GEOCAP inclusions 2006-2013, GIS-based assessment of exposure based on RPG and CLC sources).

|                                                                  | 0-6 years old          |                    |                           |                         | 7-14 years old         |                    |                           |                         |
|------------------------------------------------------------------|------------------------|--------------------|---------------------------|-------------------------|------------------------|--------------------|---------------------------|-------------------------|
|                                                                  | Controls<br>(N=18,707) | Cases<br>(N=1,958) | OR (95%CI) <sup>(1)</sup> | <i>p</i> <sup>(2)</sup> | Controls<br>(N=21,489) | Cases<br>(N=1,130) | OR (95%CI) <sup>(1)</sup> | <i>p</i> <sup>(2)</sup> |
| <b>Presence of vines within 1000 m</b>                           |                        |                    |                           |                         |                        |                    |                           |                         |
| No vines, no other crops, UU <sup>(3)</sup> ≥100,000 inhabitants | 4,276                  | 395                | 0.83 (0.61,1.12)          |                         | 4,338                  | 228                | 0.92 (0.63,1.34)          |                         |
| No vines, no other crops, UU <sup>(3)</sup> <100,000 inhabitants | 485                    | 53                 | 1 (Ref)                   |                         | 565                    | 32                 | 1 (Ref)                   |                         |
| No vines, other crops <sup>(4)</sup> ≤ 1000 m but none ≤ 500 m   | 2,354                  | 258                | 0.98 (0.72,1.34)          |                         | 2,619                  | 122                | 0.82 (0.55,1.22)          |                         |
| No vines, other crops <sup>(4)</sup> ≤ 500 m                     | 9,815                  | 1067               | 0.97 (0.73,1.30)          |                         | 11,729                 | 629                | 0.94 (0.65,1.36)          |                         |
| Possible presence of vines ≤ 1000 m <sup>(5)</sup>               | 220                    | 29                 | 1.20 (0.74,1.95)          |                         | 235                    | 15                 | 1.13 (0.60,2.13)          |                         |
| Probable presence of vines ≤ 1000 m <sup>(6)</sup>               | 1,557                  | 156                | 0.90 (0.65,1.25)          |                         | 2,003                  | 104                | 0.92 (0.61,1.38)          |                         |
| <b>Density of viticulture within 1000 m <sup>(7)</sup></b>       |                        |                    |                           |                         |                        |                    |                           |                         |
| RPG and CLC (sensible indicator)                                 |                        |                    | 1.04 (0.98,1.10)          | 0.10                    |                        |                    | 1.05 (0.98,1.13)          | 0.08                    |

RPG: Graphic Parcel Register, CLC: Corine Land Cover

<sup>(1)</sup> Odds ratio (OR) and 95% confidence interval (CI) estimated by unconditional logistic regression adjusted for age categories (<1,[1-4],[5-6],[7-9],[10-14]).

<sup>(2)</sup> one-sided *p*-values for the slope parameter in the quantitative analysis with the density of vines within 1000 m

<sup>(3)</sup> size of urban unit (UU);

<sup>(4)</sup> at least one plot identified by RPG or CLC with a crop different from vines

<sup>(5)</sup> at least one vine plot identified by CLC, but no vines identified with RPG

<sup>(6)</sup> at least one vine plot identified by RPG

<sup>(7)</sup> OR associated with a 10% increase in viticulture density.

Table S4 – Association between the density of viticulture and the risk of acute lymphoblastic leukemia in the *Occitanie* region - Parameter estimates and 95% confidence interval (CI) in 11 density categories<sup>(1)</sup> of viticulture density (based on polygons associated with CLC and RPG and with RPG alone), data for Figure S4.

| RPG and CLC                               |          |       |                     |                       | RPG alone                                 |          |       |                     |                       |
|-------------------------------------------|----------|-------|---------------------|-----------------------|-------------------------------------------|----------|-------|---------------------|-----------------------|
| Median viticulture density <sup>(1)</sup> | controls | cases | beta <sup>(2)</sup> | 95% CI <sup>(2)</sup> | Median viticulture density <sup>(1)</sup> | controls | cases | beta <sup>(2)</sup> | 95% CI <sup>(2)</sup> |
| 0                                         | 2008     | 163   | -1.94               | -2.15;-1.72           | 0                                         | 2130     | 170   | -1.94               | -2.15;-1.72           |
| 0.001                                     | 125      | 6     | -2.38               | -3.22;-1.54           | 0.001                                     | 108      | 10    | -1.74               | -2.41;-1.06           |
| 0.008                                     | 128      | 3     | -3.28               | -4.44;-2.13           | 0.004                                     | 114      | 4     | -2.80               | -3.81;-1.80           |
| 0.022                                     | 122      | 9     | -2.13               | -2.87;-1.40           | 0.010                                     | 114      | 4     | -2.86               | -3.87;-1.85           |
| 0.049                                     | 124      | 6     | -2.41               | -3.25;-1.57           | 0.018                                     | 110      | 8     | -1.98               | -2.72;-1.24           |
| 0.103                                     | 123      | 7     | -2.21               | -2.99;-1.43           | 0.030                                     | 107      | 10    | -1.76               | -2.43;-1.09           |
| 0.173                                     | 118      | 12    | -1.63               | -2.26;-1.01           | 0.044                                     | 111      | 6     | -2.30               | -3.14;-1.45           |
| 0.256                                     | 123      | 7     | -2.32               | -3.10;-1.54           | 0.063                                     | 110      | 7     | -2.31               | -3.15;-1.47           |
| 0.340                                     | 122      | 8     | -2.15               | -2.88;-1.41           | 0.094                                     | 111      | 6     | -2.33               | -3.17;-1.49           |
| 0.445                                     | 110      | 20    | -1.18               | -1.68;-0.68           | 0.142                                     | 105      | 12    | -1.56               | -2.18;-0.94           |
| 0.602                                     | 120      | 10    | -1.86               | -2.53;-1.19           | 0.269                                     | 103      | 14    | -1.32               | -1.91;-0.73           |

RPG: Graphic Parcel Register, CLC: Corine Land Cover

<sup>(1)</sup> the first category grouped children with no viticulture area within 1000 m of their geocoded address, and the following 10 categories corresponded to deciles of viticulture density

<sup>(2)</sup> parameter estimate and 95% confidence interval for each category of viticulture density

Figure S1- Joint distribution of size of urban unit and viticulture density (exposure assessment based on polygons associated with CLC and RPG (a) and with RPG alone (b)) in controls.

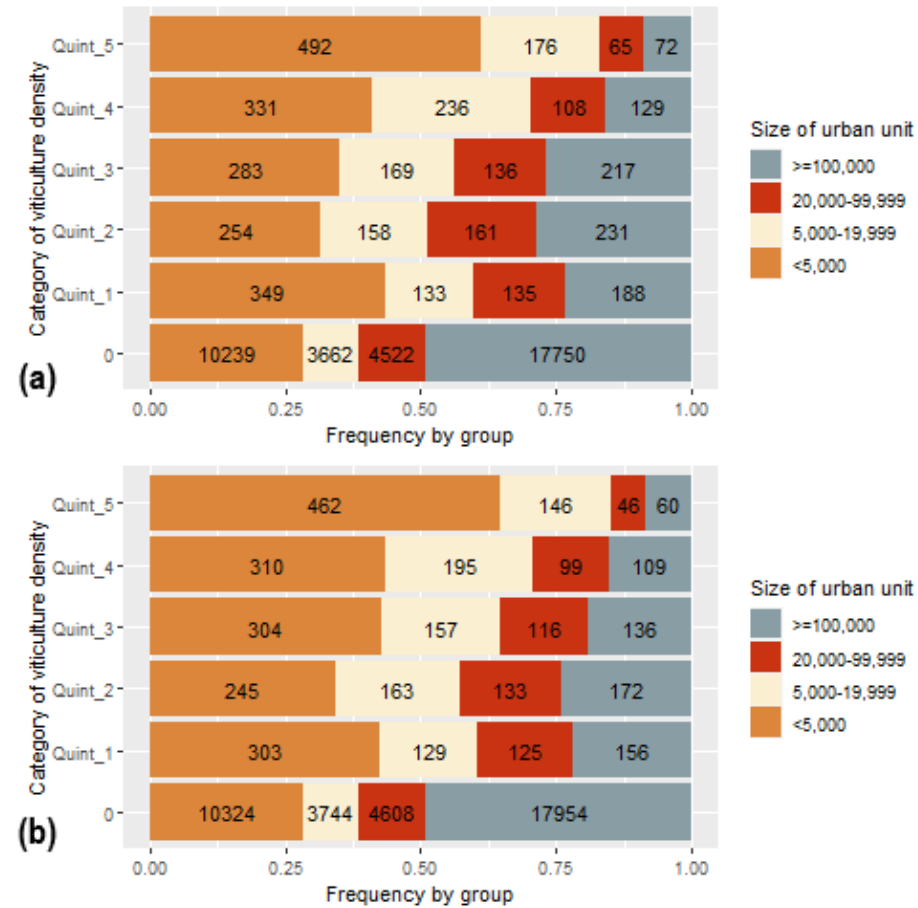

RPG: Graphic Parcel Register, CLC: Corine Land Cover

Notes: The controls were divided into 6 categories of exposure: unexposed children (no viticulture within 1000 m of the address) + quintiles of viticulture density for exposed children.

Quintiles defining categories in (a): 0.5%, 3.4%, 11.9%, 30.8%

Quintiles defining categories in (b): 0.3%, 1.2%, 3.6%, 8.6%

Figure S2 – Joint distribution of viticulture density (exposure assessment based on polygons associated with CLC and RPG **(a)** and with RPG alone **(b)**) and three potential confounding factors (FDep deprivation index of the municipality, average daily UV radiation level in the municipality, length of major roads within 150 m of the address) in controls.

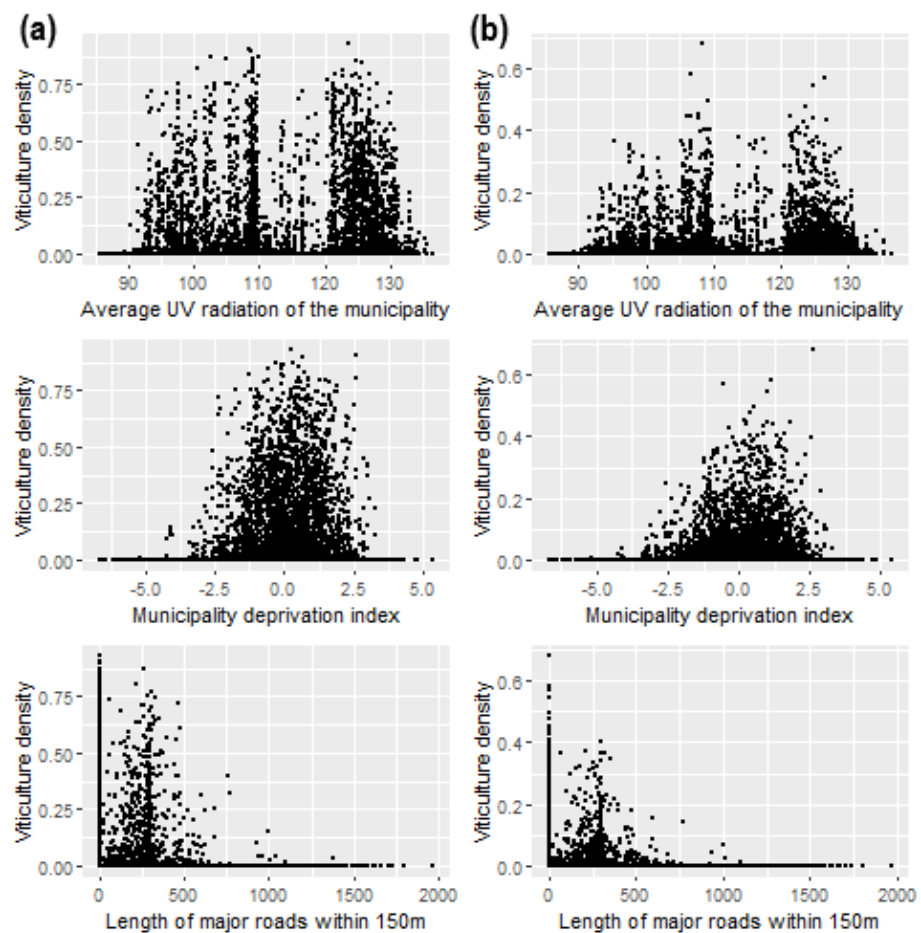

RPG: Graphic Parcel Register, CLC: Corine Land Cover  
Data from Table S2.



Figure S3 – Viticultural density in the municipalities of the French regions, calculated as the proportion of the municipality areas dedicated to viticulture

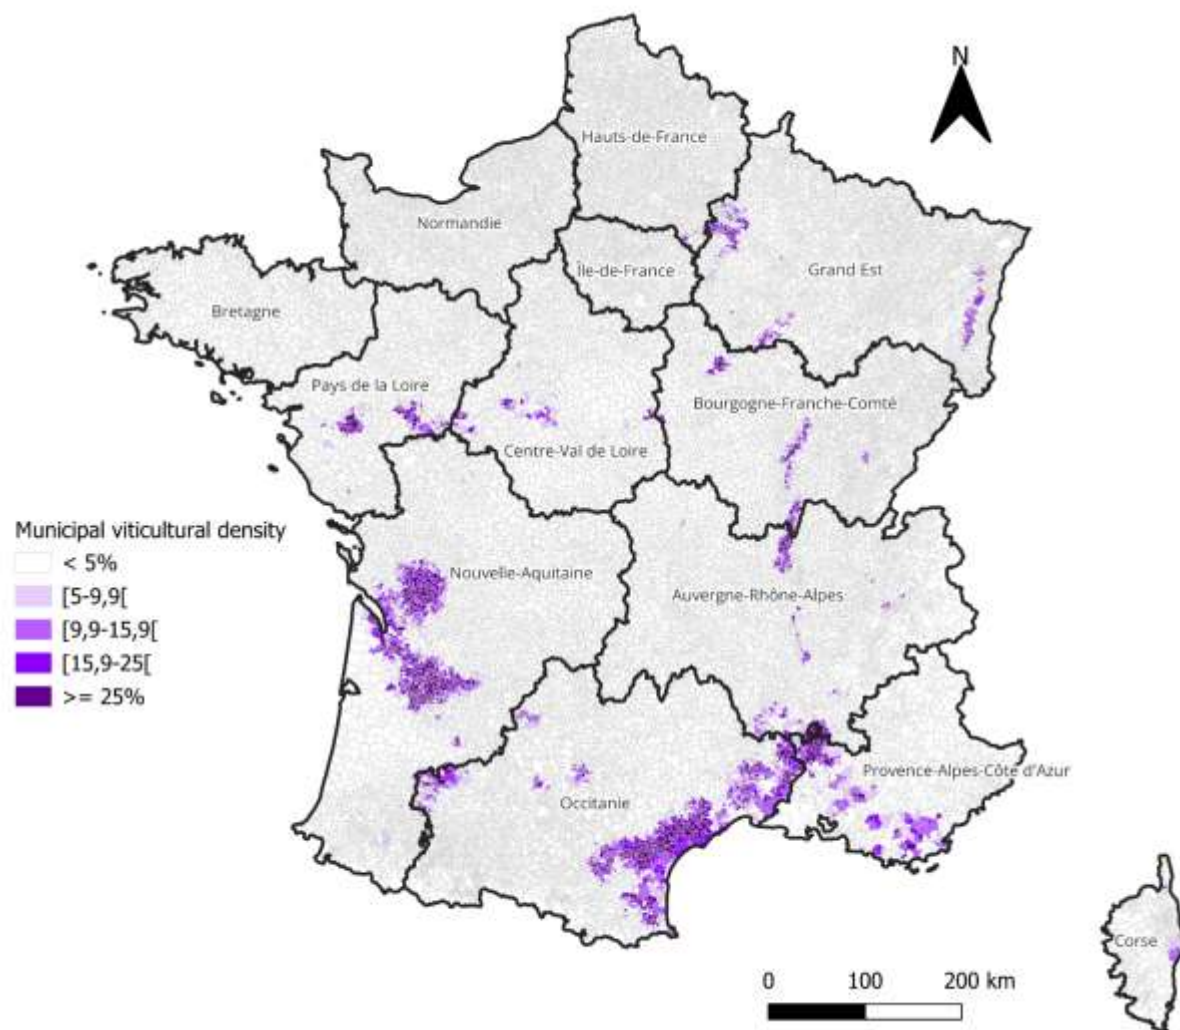

Map generated by our team using agricultural census data, municipality boundaries (DataGouv France with © information from OpenStreetMap contributors under the ODbL license) and QGIS 3.28 software.

Figure S4 – Non-linear logistic regression model of the association between viticulture density and risk of childhood lymphoblastic leukemia in the *Occitanie* region (exposure assessment based on polygons associated with CLC and RPG **(a)** and with RPG alone **(b)**)

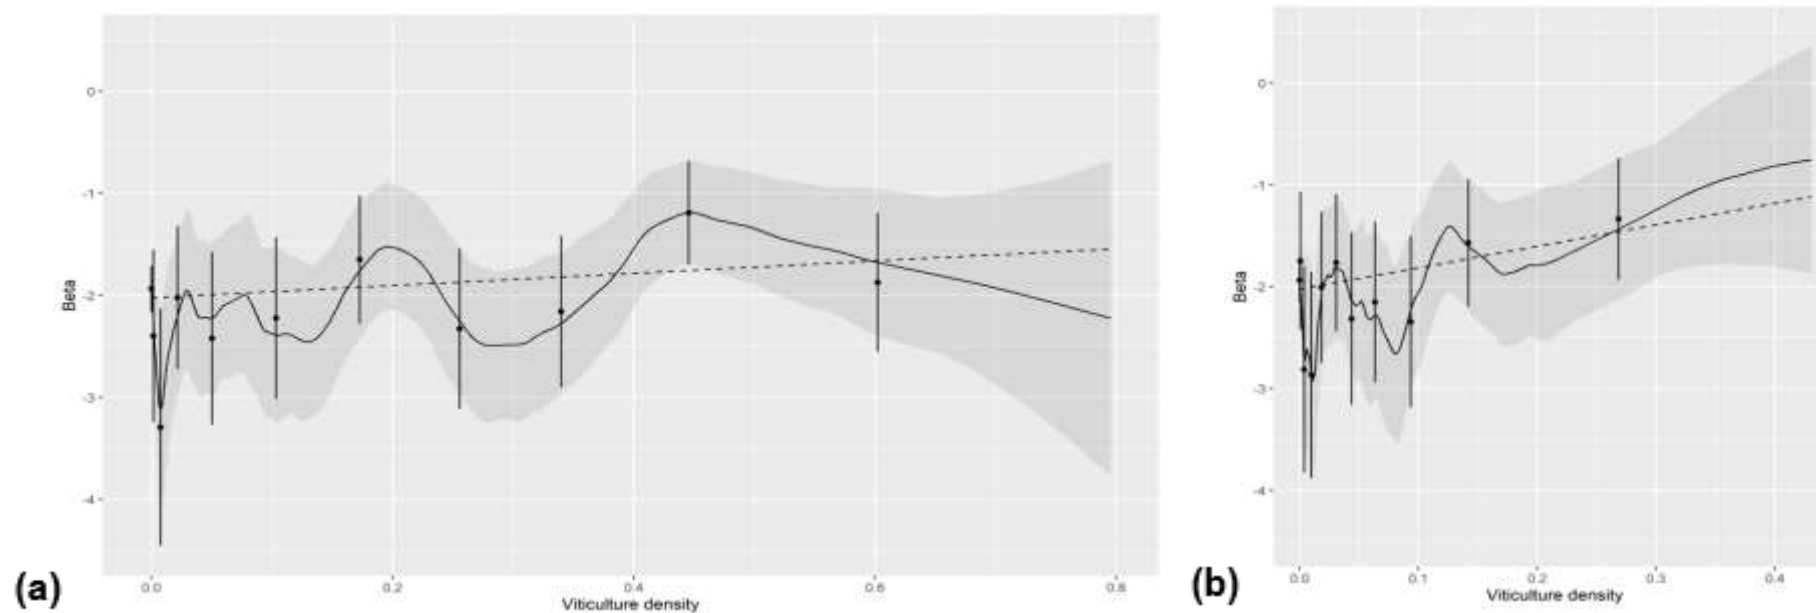

RPG: Graphic Parcel Register, CLC: Corine Land Cover

Notes: The solid line shows the LOESS model fit with 95% confidence interval ribbon; the dotted line shows linear model fit; the vertical bars show the parameter values and 95%CI for 11 categories (non-exposed children + 10 decile categories of viticulture density for the exposed children) estimated with a qualitative model.

Data from Table S4.
