# Supplementary material
Source: PubMed Central journal article supplement (PMC10583703)
Supplement: ehp12634.smcontents.508.pdf [file ehp12634.smcontents.508.pdf]

**Note to readers with disabilities:** *EHP* strives to ensure that all journal content is accessible to all readers. However, some figures and Supplemental Material published in *EHP* articles may not conform to [508 standards](#) due to the complexity of the information being presented. If you need assistance accessing journal content, please contact [ehp508@niehs.nih.gov](mailto:ehp508@niehs.nih.gov). Our staff will work with you to assess and meet your accessibility needs within 3 working days.

### **Supplemental Material**

#### **Association between Residential Proximity to Viticultural Areas and Childhood Acute Leukemia Risk in Mainland France: GEOCAP Case-Control Study, 2006–2013**

Matthieu Mancini, Denis Hémon, Perrine de Crouy-Chanel, Laurence Guldner, Laure Faure, Jacqueline Clavel, and Stéphanie Goujon

#### **Table of Contents**

**Table S1.** Distribution of the controls with respect to the geocoding uncertainty and the size of urban unit.

**Table S2.** Distribution of controls according to viticulture density (based on CLC and RPG and on RPG alone), FDep deprivation index, average daily UV radiation level, and length of major roads within 150 m, data for Figure S2.

**Table S3.** Association between childhood lymphoblastic acute leukemia and indicators of proximity to vines, by age group (GEOCAP inclusions 2006–2013, GIS-based assessment of exposure based on RPG and CLC sources).

**Table S4.** Association between the density of viticulture and the risk of acute lymphoblastic leukemia in the *Occitanie* region - Parameter estimates and 95% confidence interval (CI) in 11 density categories of viticulture density (based on polygons associated with CLC and RPG and with RPG alone), data for Figure S4.

**Figure S1.** Joint distribution of size of urban unit and viticulture density (exposure assessment based on polygons associated with CLC and RPG **(a)** and with RPG alone **(b)**) in controls.

**Figure S2.** Joint distribution of viticulture density (exposure assessment based on polygons associated with CLC and RPG **(a)** and with RPG alone **(b)**) and three potential confounding factors (FDep deprivation index of the municipality, average daily UV radiation level in the municipality, length of major roads within 150 m of the address) in controls.

**Figure S3.** Viticultural density in the municipalities of the French regions, calculated as the proportion of the municipality areas dedicated to viticulture.

**Figure S4.** Non-linear logistic regression model of the association between viticulture density and risk of childhood lymphoblastic leukemia in the *Occitanie* region (exposure assessment based on polygons associated with CLC and RPG **(a)** and with RPG alone **(b)**).
